# Supplementary material
Source: PubMed Central journal article supplement (PMC2894617)
Supplement: NIHMS198639-supplement-si.pdf [file NIHMS198639-supplement-si.pdf]

**SUPPLEMENTAL MATERIAL**

**Exercise Blood Pressure and Future Cardiovascular Death in Asymptomatic Individuals**

Sandra A. Weiss, Roger S. Blumenthal, A. Richey Sharrett, Rita F. Redberg, and Samia Mora  
CirculationAHA/2009/895292

Supplementary Table. Incremental value of Bruce stage 2 exercise blood pressure over baseline BP and risk factors

| Models                                               | Discrimination<br>C-Index<br>(change) <sup>a</sup> | Goodness-of-Fit,<br>Likelihood Ratio<br>$\chi^2$ (p value) <sup>b</sup> | NRI, % <sup>c</sup><br>(95% CI) | IDI, % <sup>d</sup><br>(p value) | Relative<br>IDI, % <sup>d</sup> |
|------------------------------------------------------|----------------------------------------------------|-------------------------------------------------------------------------|---------------------------------|----------------------------------|---------------------------------|
| <b>Non-Hypertension</b>                              |                                                    |                                                                         |                                 |                                  |                                 |
| Referent model                                       | 0.822 (Ref.)                                       | Ref.                                                                    | Ref.                            | Ref.                             | Ref.                            |
| Referent model <i>plus</i> Bruce stage 2 SBP>180mmHg | 0.828 (0.006)                                      | 11.34 (<0.001)                                                          | 12.0 (-0.1, 24.2)               | 0.45 (0.02)                      | 14.3                            |
| Referent model <i>plus</i> Bruce stage 2 DBP>90mm Hg | 0.824 (0.001)                                      | 3.41 (0.06)                                                             | 9.9 (-0.3, 20.0)                | 0.37 (0.03)                      | 12.0                            |
| <b>Hypertension</b>                                  |                                                    |                                                                         |                                 |                                  |                                 |
| Referent model                                       | 0.787 (Ref.)                                       | Ref.                                                                    | Ref.                            | Ref.                             | Ref.                            |
| Referent model <i>plus</i> Bruce stage 2 SBP>180mmHg | 0.787 (0.001)                                      | 2.11 (0.15)                                                             | 3.6 (-1.9, 9.0)                 | 0.07 (0.34)                      | 0.8                             |
| Referent model <i>plus</i> Bruce stage 2 DBP>90mm Hg | 0.791 (0.004)                                      | 4.98 (0.03)                                                             | 8.2 (0.1, 16.2)                 | 0.34 (0.12)                      | 3.9                             |
| <b>Prehypertension</b>                               |                                                    |                                                                         |                                 |                                  |                                 |
| Referent model                                       | 0.784 (Ref.)                                       | Ref.                                                                    | --                              | --                               | --                              |
| Referent model <i>plus</i> Bruce stage 2 SBP>180mmHg | 0.789 (0.006)                                      | 4.82 (0.03)                                                             | --                              | --                               | --                              |
| Referent model <i>plus</i> Bruce stage 2 DBP>90mm Hg | 0.784 (0.001)                                      | 0.96 (0.33)                                                             | --                              | --                               | --                              |
| <b>Normal BP</b>                                     |                                                    |                                                                         |                                 |                                  |                                 |
| Referent model                                       | 0.866 (Ref.)                                       | Ref.                                                                    | --                              | --                               | --                              |
| Referent model <i>plus</i> Bruce stage 2 SBP>180mmHg | 0.868 (0.002)                                      | 6.71 (0.001)                                                            | --                              | --                               | --                              |
| Referent model <i>plus</i> Bruce stage 2 DBP>90mm Hg | 0.866 (0.0001)                                     | 4.03 (0.04)                                                             | --                              | --                               | --                              |

Referent model: Baseline BP (systolic, diastolic) and non-BP risk factors (age, sex, diabetes, LDL cholesterol, HDL cholesterol, triglycerides, smoking, body mass index, and family history).

<sup>a</sup> Model discrimination was examined using Harrell's c-index, a generalization of the area under the receiver operator characteristic curve.

<sup>b</sup> Values are likelihood ratio  $\chi^2$  and p values obtained from the Cox proportional hazards regression comparing models that added either Bruce stage 2 exercise systolic or diastolic blood pressure to the referent model. A higher  $\chi^2$  value indicates a better model fit.

<sup>c</sup> NRI is the net reclassification index, which compares the proportions moving up or down in clinical categories ( $\leq 2.5\%$ , 2-5-10%,  $>10\%$ ) in cases versus controls, comparing models that added either Bruce stage 2 exercise systolic or diastolic blood pressure to the referent model. The NRI was calculated at 10 years of follow-up.

<sup>d</sup> IDI is the integrated discrimination improvement, comparing the integrals of sensitivity and specificity under two models (referent model compared with the model that added either Bruce stage 2 exercise systolic or diastolic blood pressure). The relative IDI is calculated as the IDI divided by the discrimination slope of the referent model. The IDI was calculated at 10 years of follow-up.
